# Supplementary material for: Photo-controllable heterostructured crystals of metal–organic frameworksviareversible photocycloaddition
Source: Royal Society of Chemistry journal article supplement (doi:10.1039/d2sc06732c), 2023-01-01
Supplement: d2sc06732c1.pdf [file d2sc06732c1.pdf]

## Supporting Information for

### **Photo-controllable Heterostructured Crystal of Metal-Organic Framework via Reversible Photocycloaddition**

Xin-Da Huang,<sup>a‡</sup> Ben-Kun Hong,<sup>b‡</sup> Ge-Hua Wen,<sup>a</sup> Shu-Hua Li<sup>\*b</sup> and Li-Min Zheng<sup>\*a</sup>

<sup>a</sup>State Key Laboratory of Coordination Chemistry, School of Chemistry and Chemical Engineering, Collaborative Innovation Centre of Advanced Microstructures, Nanjing University, Nanjing 210023, P. R. China.

<sup>b</sup>Institute of Theoretical and Computational Chemistry, School of Chemistry and Chemical Engineering, Nanjing University, Nanjing 210023, China.

<sup>‡</sup>These authors contributed equally to this work.

\*E-mail: [lmzheng@nju.edu.cn](mailto:lmzheng@nju.edu.cn), [shuhua@nju.edu.cn](mailto:shuhua@nju.edu.cn)

## Contents

|                                                                      |     |
|----------------------------------------------------------------------|-----|
| I. Experimental section .....                                        | S3  |
| II. Single-crystal-to-single-crystal structural transformation ..... | S5  |
| III. Calculation.....                                                | S18 |
| IV. Photoluminescent switching .....                                 | S22 |
| V. Photogenerated heterostructured crystal as photonic barcode ..... | S26 |
| VI. Photochemical effect .....                                       | S28 |
| VII. References .....                                                | S32 |

## I. Experimental section

**General materials and measurements.** The ligand of depma<sub>2</sub> was synthesized according to the literature.<sup>[1]</sup> All other starting materials were of analytical grade obtained from commercial sources and used without any purification. PE 240C analyser were carried out to do the elemental analyses for C, H and N. The instrument to collect powder X-ray diffraction (PXRD) data was Bruker D8 advance diffractometer with Cu-K<sub>α</sub> radiation in a range of 5-50°. The Fourier infrared spectra were attained from Bruker Tensor 27 spectrometer in 4000-600 cm<sup>-1</sup> region. Thermogravimetric (TG) analyses were collected on a Mettler Toledo TGA/DSC 1 instrument in the range of 30-600 °C under a nitrogen flow (20 mL/min) at a heating rate of 5 °C min<sup>-1</sup>. The determination of differential scanning calorimetry (DSC) was conducted on Mettler DSC823e instrument. The UV/Vis spectra were measured on a Perkin Elmer Lambda 950 UV/VIS/NIR spectrometer using powder samples. All measurements related to the photochemical reactions were performed upon irradiation with 280 or 365 nm LED UV light (50 W *IUVOT* UV lamp, powder setting: 20% power, power density: ca. 100 mW cm<sup>-2</sup>).

**X-ray crystallography.** Single crystals were used for data collections on a Bruker D8 Venture diffractometer using graphite-monochromated Mo-K<sub>α</sub> radiation ( $\lambda = 0.71073 \text{ \AA}$ ) for compounds **1**, **2** and **3**, or a Bruker D8 Liquid Metal-jet diffractometer using Ga K<sub>α</sub> radiation ( $\lambda = 1.34139 \text{ \AA}$ ) for reverse **2**. The data were integrated using the Siemens SAINT program,<sup>[2]</sup> with the intensities corrected for Lorentz factor, polarization, air absorption, and absorption due to variation in the path length through the detector faceplate. Empirical absorption corrections were applied using the SADABS program.<sup>[3]</sup> The structures were solved by direct method and refined on  $F^2$  by full-matrix least squares using SHELXTL.<sup>[4]</sup> All the non-hydrogen atoms were refined anisotropically. All hydrogen atoms were located in a difference map, added geometrically, and isotropically refined with a riding model. The residual electron densities were of no chemical significance. CCDC 2214247-2214250 contain the supplementary crystallographic data for this paper. These data can be obtained free of charge from the Cambridge Crystallographic Data Centre via [www.ccdc.cam.ac.uk/data\\_request/cif](http://www.ccdc.cam.ac.uk/data_request/cif).

**General photoluminescent measurement.** The steady fluorescence spectra were attained at Bruker Spectrofluorimeter LS55. Time-resolved emission decays and absolute photoluminescent quantum yield (PLQY) were carried out on Fluorolog-3 spectrofluorometer (Horiba Scientific). Nanosecond lifetime decays were conducted using a TCSPC MCA model equipped with a picosecond photodetector (<200 ps) (PPD850) and picosecond laser (duration is 180 ps, Deltadiode, 100 MHz laser). Microsecond lifetime decays were collected by a MCS mode on TCSPC HUB (DeltaHUB) with a LED source (SpectraLED) as a sample excitation source. All decay profiles are fitted reasonably to a single or double exponential function using the software DAS6 attached to FluoroLog-UltraFast (HORIBA Instrument Inc, Edison) to give lifetime.

**Optical microscopy measurements.** As for the experiments of fabricating heterostructure crystals and photo-inducing crystal deformation of rod-like crystals, the optical images and movies were collected using Caikang XPF-550C polarization microscope equipped with LED UV lamp (IUVOT 50 W).

**Synthesis of  $[\text{Dy}(\text{NO}_3)_3(\text{depma}_2)_{1.5}] \cdot (\text{depma}_2)_{0.5} \cdot \text{CH}_3\text{OH}$  (1).** A 5 mL methanol solution dissolved with  $\text{Dy}(\text{NO}_3)_3 \cdot 6\text{H}_2\text{O}$  (0.05 mmol, 22.8 mg) was mixed with 5 mL  $\text{CH}_2\text{Cl}_2$  containing  $\text{depma}_2$  (0.1 mmol, 65.6 mg) and was then left at room temperature for three days to afford colorless rod-like crystals with a yield of 50.2 mg (56.7 %). Notably, uniform needle-like crystals for photochemical researches were isolated from the 10 mL methanol solution after the slow evaporation for two weeks. Elemental anal. Calcd (%): C, 54.60; H, 5.24; N, 2.48. Found (%): C, 54.43; H, 5.21; N, 2.22. IR ( $\text{cm}^{-1}$ ): 3395(w), 3070(vw), 3040(vw), 2987(w), 2927(w), 2905(vw), 2865(vw), 1734(vw), 1632(w), 1517(w), 1493(m), 1474(s), 1453(m), 1424(w), 1393(w), 1368(w), 1293(s), 1258(w), 1206(m), 1180(s), 1150(m), 1100(w), 1096(w), 1050(vs), 1025(vs), 987(w), 972(w), 948(w), 873 (w), 814(vw), 802(vw), 781(m), 765(w), 744(w), 718(w), 688(m), 645(w).

**Synthesis of  $[\text{Dy}(\text{NO}_3)_3(\text{depma}_2)_{1.5}] \cdot (\text{depma}_2)_{0.5}$  (2).** The desolvation phase **2** can be obtained by keep compound **1** in air for several days or thermal annealing at  $80^\circ\text{C}$  for 10 min. Elemental anal. Calcd (%): C, 54.40; H, 5.05; N, 2.50. Found (%): C, 53.98; H, 5.16; N, 2.55.

**Synthesis of  $[\text{Dy}(\text{NO}_3)_3(\text{depma})(\text{depma}_2)] \cdot (\text{depma}_2)_{0.5}$  (3).** The thermal annealing of compound **1** or **2** at  $140^\circ\text{C}$  for 5 min provided compound **3**. Elemental anal. Calcd (%): C, 54.40; H, 5.05; N, 2.50. Found (%): C, 54.25; H, 5.10; N, 2.46.

## II. Single-crystal-to-single-crystal structural transformation

**Table S1.** Crystallographic data for **1**, **2**, **3** and reversed **2** from exposure of **3** to 365 nm UV light.

| Compounds                                                                                | <b>1</b>                                                                        | <b>2</b>           | <b>3</b>                                                                        | reversed <b>2</b>  |
|------------------------------------------------------------------------------------------|---------------------------------------------------------------------------------|--------------------|---------------------------------------------------------------------------------|--------------------|
| Empirical formula                                                                        | C <sub>77</sub> H <sub>88</sub> DyN <sub>3</sub> O <sub>22</sub> P <sub>4</sub> |                    | C <sub>76</sub> H <sub>84</sub> DyN <sub>3</sub> O <sub>22</sub> P <sub>4</sub> |                    |
| Temperature (K)                                                                          | 193(2)                                                                          | 193(2)             | 193(2)                                                                          | 193(2)             |
| fw (g mol <sup>-1</sup> )                                                                | 1693.88                                                                         | 1661.84            | 1661.84                                                                         | 1661.84            |
| Crystal system                                                                           | Triclinic                                                                       | Triclinic          | Triclinic                                                                       | Triclinic          |
| Space group                                                                              | <i>P</i> $\bar{1}$                                                              | <i>P</i> $\bar{1}$ | <i>P</i> $\bar{1}$                                                              | <i>P</i> $\bar{1}$ |
| <i>a</i> (Å)                                                                             | 12.0582(4)                                                                      | 12.0168(18)        | 12.1321(10)                                                                     | 12.0667(5)         |
| <i>b</i> (Å)                                                                             | 13.8579(5)                                                                      | 13.485(2)          | 13.3341(10)                                                                     | 13.4722(6)         |
| <i>c</i> (Å)                                                                             | 23.2328(8)                                                                      | 23.445(3)          | 23.3083(17)                                                                     | 23.4814(10)        |
| $\alpha$ (°)                                                                             | 90.6460(10)                                                                     | 90.470(6)          | 90.473(3)                                                                       | 90.745(2)          |
| $\beta$ (°)                                                                              | 97.9700(10)                                                                     | 97.255(4)          | 95.995(3)                                                                       | 97.128(2)          |
| $\gamma$ (°)                                                                             | 86.0330(10)                                                                     | 93.184(6)          | 92.718(3)                                                                       | 93.145(2)          |
| <i>V</i> (Å <sup>3</sup> )                                                               | 3835.5(2)                                                                       | 3762.6(10)         | 3745.4(5)                                                                       | 3781.3(3)          |
| <i>Z</i>                                                                                 | 2                                                                               | 2                  | 2                                                                               | 2                  |
| $\rho_{\text{calcd}}$ (g cm <sup>-3</sup> )                                              | 1.467                                                                           | 1.467              | 1.474                                                                           | 1.460              |
| <i>F</i> (000)                                                                           | 1746                                                                            | 1710               | 1710                                                                            | 1710               |
| goodness-of-fit on <i>F</i> <sup>2</sup>                                                 | 1.040                                                                           | 1.080              | 1.095                                                                           | 1.140              |
| <i>R</i> <sub>1</sub> , <i>wR</i> <sub>2</sub> [ <i>I</i> > 2σ( <i>I</i> )] <sup>a</sup> | 0.0504, 0.1148                                                                  | 0.0690, 0.1765     | 0.0581, 0.1485                                                                  | 0.0755, 0.2062     |
| <i>R</i> <sub>1</sub> , <i>wR</i> <sub>2</sub> (all data) <sup>a</sup>                   | 0.0697, 0.1222                                                                  | 0.0921, 0.1954     | 0.0827, 0.1704                                                                  | 0.0941, 0.2204     |
| CCDC number                                                                              | 2214247                                                                         | 2214250            | 2214249                                                                         | 2214248            |

$$^a R_1 = \sum ||F_o| - |F_c|| / \sum |F_o|, wR_2 = [\sum w(F_o^2 - F_c^2)^2 / \sum w(F_o^2)^2]^{1/2}$$

**Table S2.** Selected bond lengths (Å) and angles (°) for compound **1** at 193 K.

|            |            |             |            |
|------------|------------|-------------|------------|
| Dy1-O1     | 2.302(3)   | O4-Dy1-O14  | 146.66(17) |
| Dy1-O4     | 2.295(4)   | O4-Dy1-O16  | 74.61(12)  |
| Dy1-O7     | 2.329(3)   | O4-Dy1-O17  | 126.22(12) |
| Dy1-O10    | 2.433(4)   | O7-Dy1-O10  | 73.42(12)  |
| Dy1-O11    | 2.465(5)   | O7-Dy1-O11  | 124.54(13) |
| Dy1-O13    | 2.414(4)   | O7-Dy1-O13  | 75.09(10)  |
| Dy1-O14    | 2.465(4)   | O7-Dy1-O14  | 124.04(14) |
| Dy1-O16    | 2.487(3)   | O7-Dy1-O16  | 77.29(12)  |
| Dy1-O17    | 2.441(4)   | O7-Dy1-O17  | 80.42(13)  |
| C2-C9A     | 1.638(6)   | O10-Dy1-O11 | 51.14(14)  |
| C21-C28B   | 1.634(5)   | O10-Dy1-O13 | 73.41(13)  |
| C40-C47C   | 1.640(6)   | O10-Dy1-O14 | 100.06(15) |
| C59-C66D   | 1.638(7)   | O10-Dy1-O16 | 140.09(13) |
| O1-Dy1-O4  | 82.16(12)  | O10-Dy1-O17 | 143.89(12) |
| O1-Dy1-O7  | 153.18(11) | O11-Dy1-O13 | 88.99(15)  |
| O1-Dy1-O10 | 127.60(13) | O11-Dy1-O14 | 73.26(17)  |
| O1-Dy1-O11 | 78.13(13)  | O11-Dy1-O16 | 145.98(13) |
| O1-Dy1-O13 | 123.61(10) | O11-Dy1-O17 | 146.89(14) |
| O1-Dy1-O14 | 73.00(13)  | O13-Dy1-O14 | 50.82(13)  |
| O1-Dy1-O16 | 76.11(12)  | O13-Dy1-O16 | 123.89(14) |
| O1-Dy1-O17 | 85.72(13)  | O13-Dy1-O17 | 76.13(13)  |
| O4-Dy1-O7  | 87.66(13)  | O14-Dy1-O16 | 118.81(15) |
| O4-Dy1-O10 | 77.67(12)  | O14-Dy1-O17 | 74.44(17)  |
| O4-Dy1-O11 | 80.23(14)  | O16-Dy1-O17 | 51.62(12)  |
| O4-Dy1-O13 | 149.49(12) |             |            |

Symmetry codes: A: -x, 2-y, 2-z; B: 1-x, 1-y, 2-z; C: 1-x, 2-y, 1-z; D: -x, 1-y, 1-z.

**Table S3.** Selected bond lengths (Å) and angles (°) for compound **2** at 193 K.

|            |            |             |            |
|------------|------------|-------------|------------|
| Dy1-O1     | 2.289(5)   | O4-Dy1-O14  | 148.7(2)   |
| Dy1-O4     | 2.288(5)   | O4-Dy1-O16  | 73.95(17)  |
| Dy1-O7     | 2.327(5)   | O4-Dy1-O17  | 125.52(16) |
| Dy1-O10    | 2.424(5)   | O7-Dy1-O10  | 73.86(17)  |
| Dy1-O11    | 2.452(6)   | O7-Dy1-O11  | 125.47(18) |
| Dy1-O13    | 2.424(5)   | O7-Dy1-O13  | 76.60(17)  |
| Dy1-O14    | 2.479(5)   | O7-Dy1-O14  | 123.18(19) |
| Dy1-O16    | 2.481(5)   | O7-Dy1-O16  | 77.21(18)  |
| Dy1-O17    | 2.454(5)   | O7-Dy1-O17  | 78.24(17)  |
| C2-C9A     | 1.634(7)   | O10-Dy1-O11 | 51.69(19)  |
| C21-C28B   | 1.627(8)   | O10-Dy1-O13 | 73.66(17)  |
| C40-C47C   | 1.622(9)   | O10-Dy1-O14 | 105.59(18) |
| C59-C66D   | 1.657(14)  | O10-Dy1-O16 | 140.0(2)   |
| O1-Dy1-O4  | 81.40(18)  | O10-Dy1-O17 | 142.75(16) |
| O1-Dy1-O7  | 153.46(16) | O11-Dy1-O13 | 85.0(2)    |
| O1-Dy1-O10 | 126.53(17) | O11-Dy1-O14 | 75.4(2)    |
| O1-Dy1-O11 | 77.59(19)  | O11-Dy1-O16 | 148.0(2)   |
| O1-Dy1-O13 | 122.57(18) | O11-Dy1-O17 | 145.41(18) |
| O1-Dy1-O14 | 71.63(17)  | O13-Dy1-O14 | 51.01(17)  |
| O1-Dy1-O16 | 76.52(18)  | O13-Dy1-O16 | 125.20(18) |
| O1-Dy1-O17 | 88.35(17)  | O13-Dy1-O17 | 76.26(17)  |
| O4-Dy1-O7  | 87.88(18)  | O14-Dy1-O16 | 113.3(2)   |
| O4-Dy1-O10 | 77.86(16)  | O14-Dy1-O17 | 70.2(2)    |
| O4-Dy1-O11 | 83.82(19)  | O16-Dy1-O17 | 51.67(17)  |
| O4-Dy1-O13 | 150.37(17) |             |            |

Symmetry codes: A: -x, -y, -z; B: 1-x, 2-y, 1-z; C: -x, 2-y, 2-z; D: 1-x, 1-y, 2-z.

**Table S4.** Selected bond lengths (Å) and angles (°) for compound **3** at 193 K.

|            |            |             |            |
|------------|------------|-------------|------------|
| Dy1-O1     | 2.290(4)   | O4-Dy1-O14  | 148.79(17) |
| Dy1-O4     | 2.298(4)   | O4-Dy1-O16  | 73.17(14)  |
| Dy1-O7     | 2.305(4)   | O4-Dy1-O17  | 124.76(13) |
| Dy1-O10    | 2.418(5)   | O7-Dy1-O10  | 73.52(14)  |
| Dy1-O11    | 2.454(5)   | O7-Dy1-O11  | 124.96(13) |
| Dy1-O13    | 2.427(5)   | O7-Dy1-O13  | 75.71(16)  |
| Dy1-O14    | 2.463(5)   | O7-Dy1-O14  | 124.76(16) |
| Dy1-O16    | 2.487(4)   | O7-Dy1-O16  | 77.45(14)  |
| Dy1-O17    | 2.451(4)   | O7-Dy1-O17  | 80.64(13)  |
| C2-C9A     | 1.632(6)   | O10-Dy1-O11 | 51.47(14)  |
| C21-C28B   | 1.631(6)   | O10-Dy1-O13 | 76.11(17)  |
| C40-C47C   | 3.60(1)    | O10-Dy1-O14 | 102.75(15) |
| C59-C66D   | 1.632(6)   | O10-Dy1-O16 | 140.87(15) |
| O1-Dy1-O4  | 81.87(14)  | O10-Dy1-O17 | 143.52(15) |
| O1-Dy1-O7  | 153.10(13) | O11-Dy1-O13 | 91.15(17)  |
| O1-Dy1-O10 | 126.80(16) | O11-Dy1-O14 | 75.18(17)  |
| O1-Dy1-O11 | 77.16(15)  | O11-Dy1-O16 | 145.98(15) |
| O1-Dy1-O13 | 122.97(16) | O11-Dy1-O17 | 146.14(14) |
| O1-Dy1-O14 | 72.12(15)  | O13-Dy1-O14 | 51.04(17)  |
| O1-Dy1-O16 | 76.09(15)  | O13-Dy1-O16 | 121.12(17) |
| O1-Dy1-O17 | 86.75(15)  | O13-Dy1-O17 | 72.82(16)  |
| O4-Dy1-O7  | 85.96(13)  | O14-Dy1-O16 | 115.31(17) |
| O4-Dy1-O10 | 79.09(14)  | O14-Dy1-O17 | 71.55(16)  |
| O4-Dy1-O11 | 82.60(14)  | O16-Dy1-O17 | 51.64(15)  |
| O4-Dy1-O13 | 152.45(15) |             |            |

Symmetry codes: A: 1-x, 1-y, -z; B: 1-x, 1-y, -z; C: -x, 1-y, 1-z; D: 1-x, -y, 1-z.



**Table S5.** Selected bond lengths (Å) and angles (°) for crystal of reversed **2** obtained from the exposure of **3** to 365 nm UV light for half an hour.

|            |            |             |          |
|------------|------------|-------------|----------|
| Dy1-O1     | 2.287(5)   | O4-Dy1-O14  | 148.7(2) |
| Dy1-O4     | 2.305(6)   | O4-Dy1-O16  | 74.0(2)  |
| Dy1-O7     | 2.326(5)   | O4-Dy1-O17  | 125.4(2) |
| Dy1-O10    | 2.431(5)   | O7-Dy1-O10  | 73.7(2)  |
| Dy1-O11    | 2.448(7)   | O7-Dy1-O11  | 125.2(2) |
| Dy1-O13    | 2.415(7)   | O7-Dy1-O13  | 77.2(2)  |
| Dy1-O14    | 2.489(7)   | O7-Dy1-O14  | 123.4(2) |
| Dy1-O16    | 2.482(7)   | O7-Dy1-O16  | 77.5(2)  |
| Dy1-O17    | 2.457(6)   | O7-Dy1-O17  | 78.2(2)  |
| C2-C9A     | 1.644(10)  | O10-Dy1-O11 | 51.7(2)  |
| C21-C28B   | 1.632(10)  | O10-Dy1-O13 | 74.3(2)  |
| C40-C47C   | 1.645(11)  | O10-Dy1-O14 | 106.7(2) |
| C59-C66D   | 1.66(2)    | O10-Dy1-O16 | 139.7(2) |
| O1-Dy1-O4  | 81.33(19)  | O10-Dy1-O17 | 143.0(2) |
| O1-Dy1-O7  | 153.50(18) | O11-Dy1-O13 | 83.9(3)  |
| O1-Dy1-O10 | 126.4(2)   | O11-Dy1-O14 | 75.3(3)  |
| O1-Dy1-O11 | 77.9(2)    | O11-Dy1-O16 | 148.4(2) |
| O1-Dy1-O13 | 122.2(2)   | O11-Dy1-O17 | 145.2(2) |
| O1-Dy1-O14 | 71.3(2)    | O13-Dy1-O14 | 50.9(2)  |
| O1-Dy1-O16 | 76.3(2)    | O13-Dy1-O16 | 125.5(2) |
| O1-Dy1-O17 | 88.5(2)    | O13-Dy1-O17 | 76.4(3)  |
| O4-Dy1-O7  | 87.78(19)  | O14-Dy1-O16 | 112.6(2) |
| O4-Dy1-O10 | 77.28(18)  | O14-Dy1-O17 | 70.0(3)  |
| O4-Dy1-O11 | 84.4(2)    | O16-Dy1-O17 | 51.6(2)  |
| O4-Dy1-O13 | 150.6(2)   |             |          |

Symmetry codes: A: -x, -y, -z; B: 1-x, 2-y, 1-z; C: -x, 2-y, 2-z; D: 1-x, 1-y, 2-z.

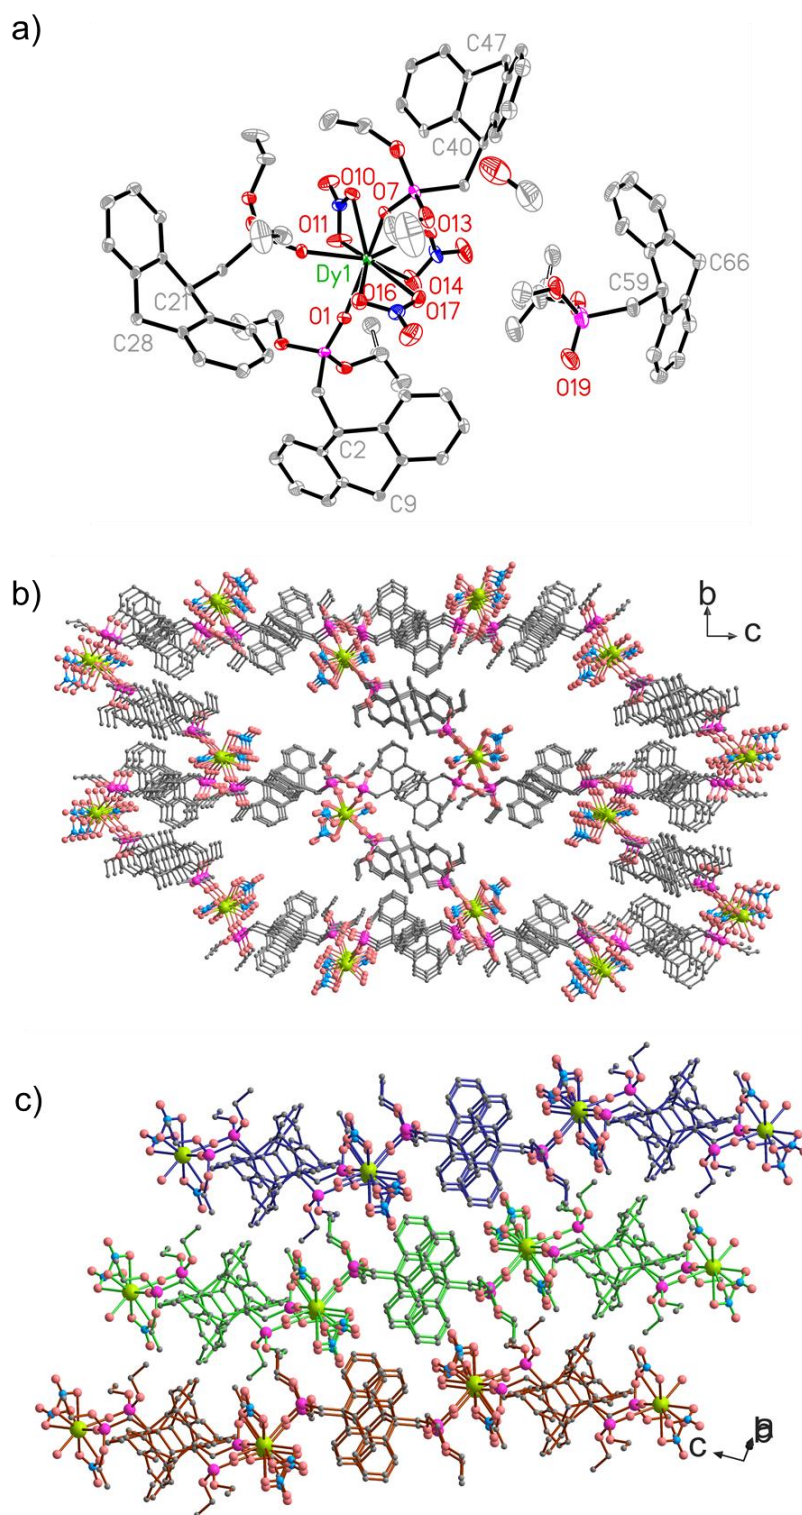

**Fig. S1** The structure of **1**. (a) The asymmetric unit with 30% thermal ellipsoids. (b, c) The layer stacking in structure **1** viewed in different directions, the guest depma<sub>2</sub>-D and methanol molecules are omitted to show clearly the channel along the *a*-axis.

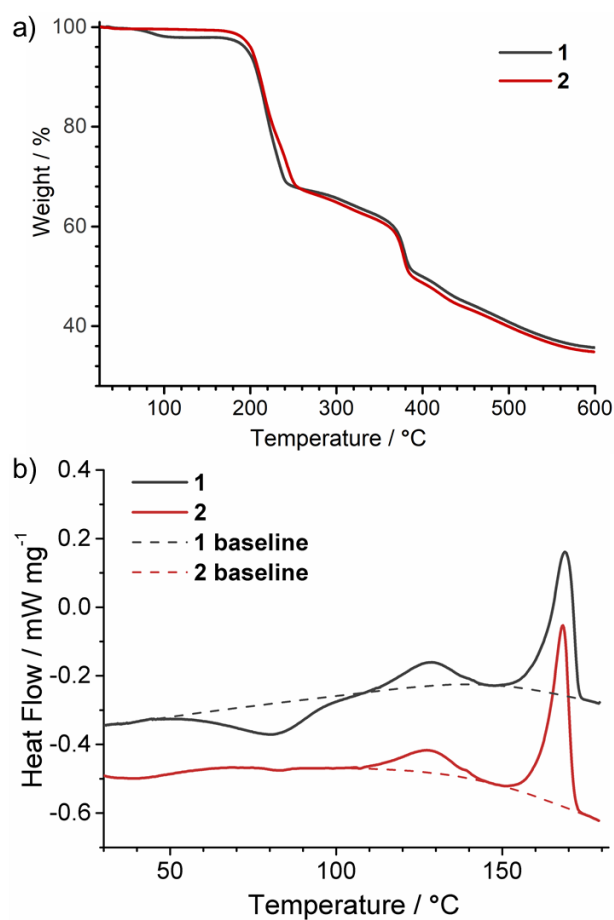

**Fig. S2** (a) Thermogravimetric analyses and (b) DSC curves of **1** and **2** measured under nitrogen atmosphere at a heating rate of 5 °C/min.

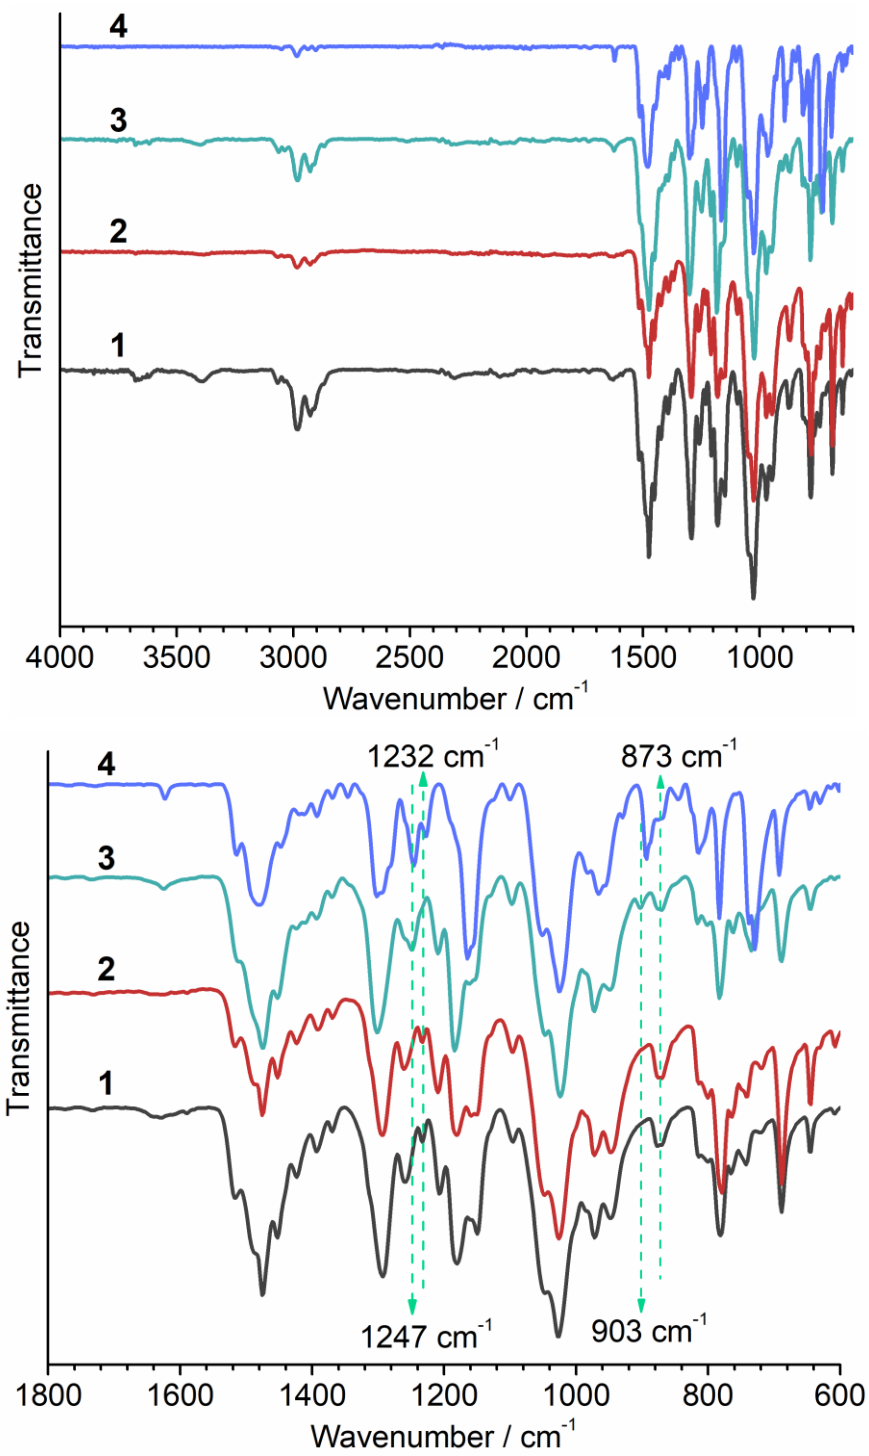

**Fig. S3** The FTIR spectra for the samples of **1** (black), **2** (red), **3** (green) and **4** (blue).

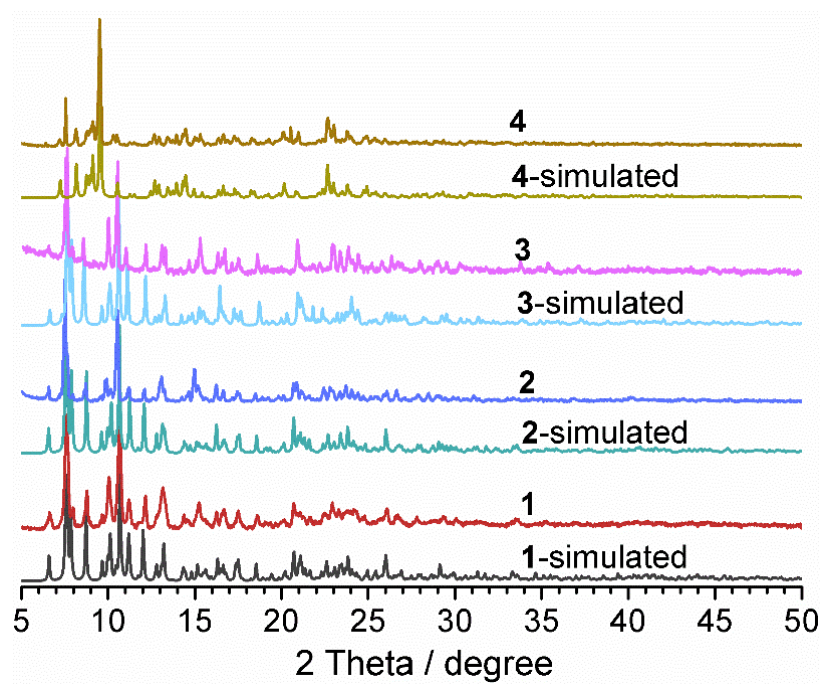

**Fig. S4** The experimental and simulated PXRD patterns for compounds **1**, **2**, **3**, and **4**.

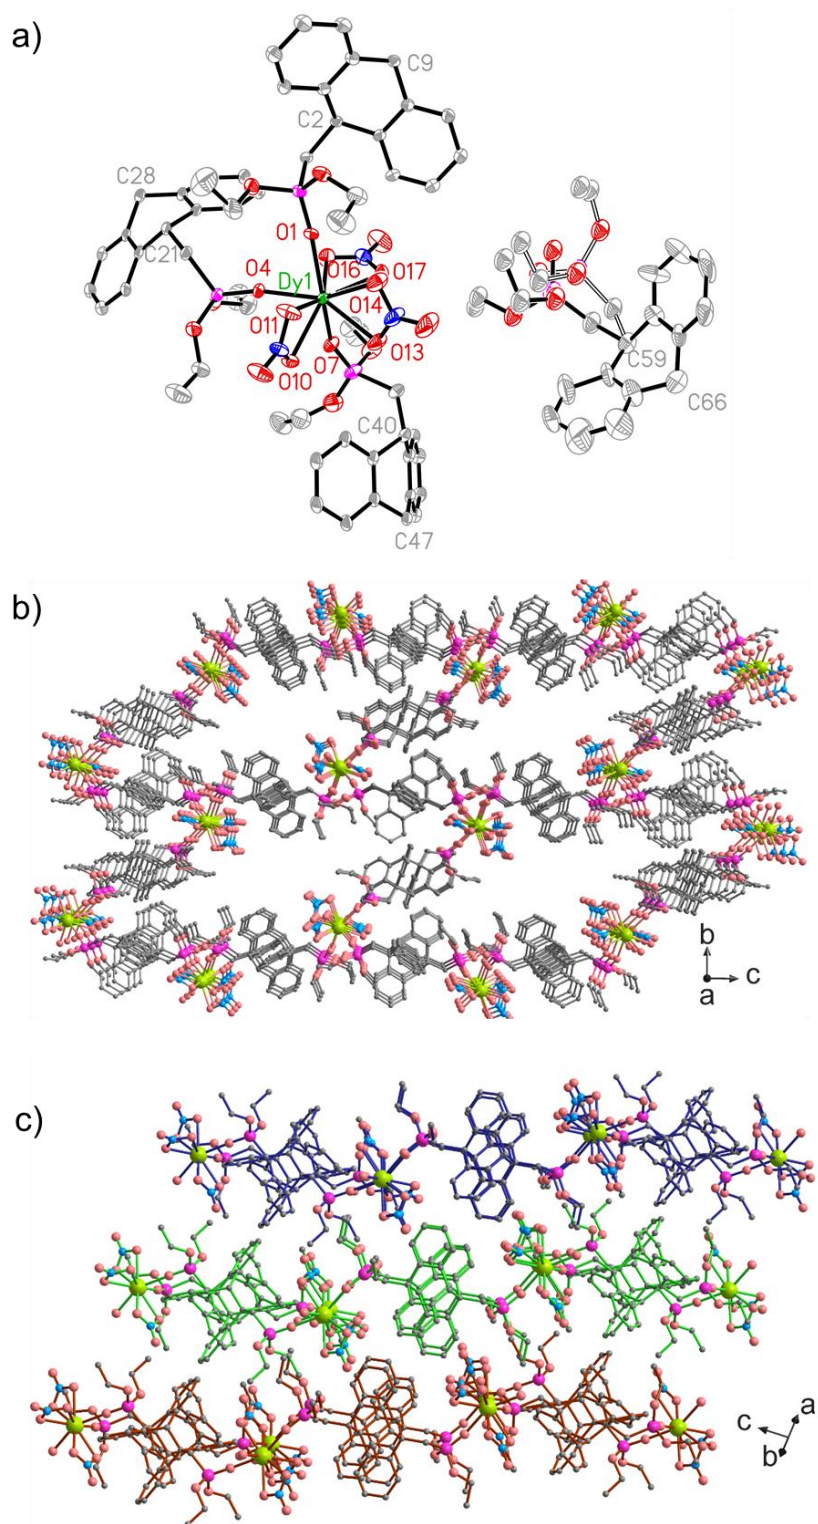

**Fig. S5** The structure of **2**. (a) The asymmetric unit with 30% thermal ellipsoids. (b, c) The layer stacking in structure **2** viewed in different directions, the guest depma<sub>2</sub>-D molecules are omitted to show clearly the channel along the *a*-axis.

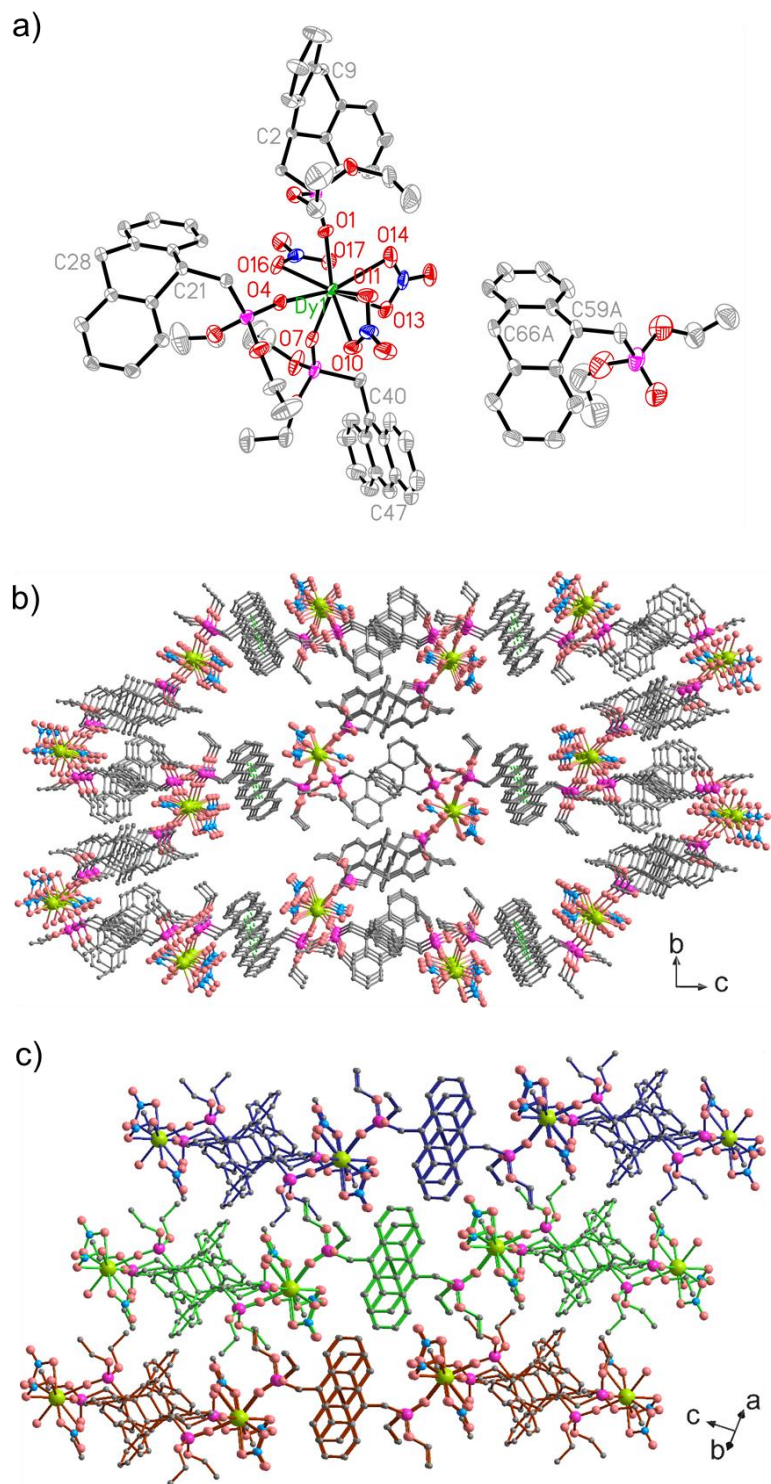

**Fig. S6** The structure of **3**. (a) The asymmetric unit with 30% thermal ellipsoids. (b, c) The layer stacking in structure **3** viewed in different directions, the guest depma<sub>2</sub>-D molecules are omitted to show clearly the channel along the *a*-axis.

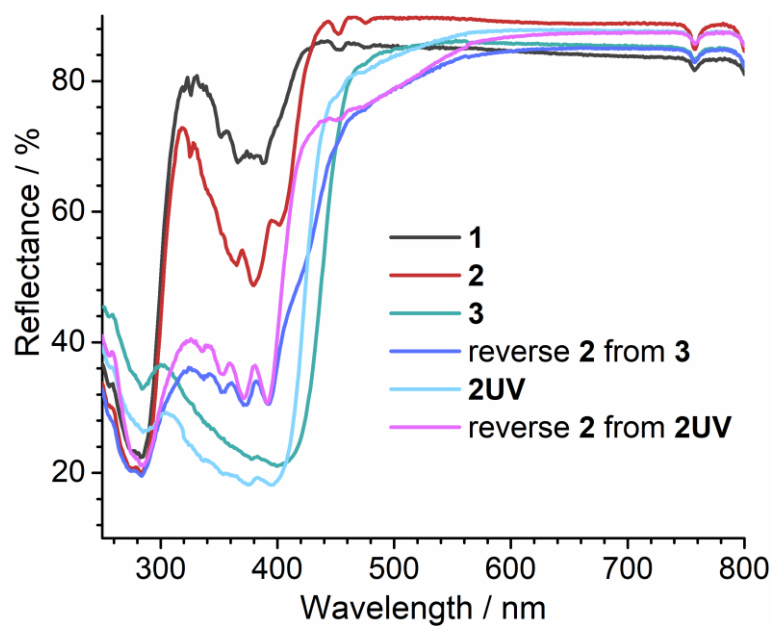

**Fig. S7** The UV-Vis diffused reflectance spectra for samples **1**, **2**, **3**, reversed **2** from the exposure of **3** to 365 nm UV light, **2UV** and the reversed **2** by exposing **2UV** to 365 nm UV light.

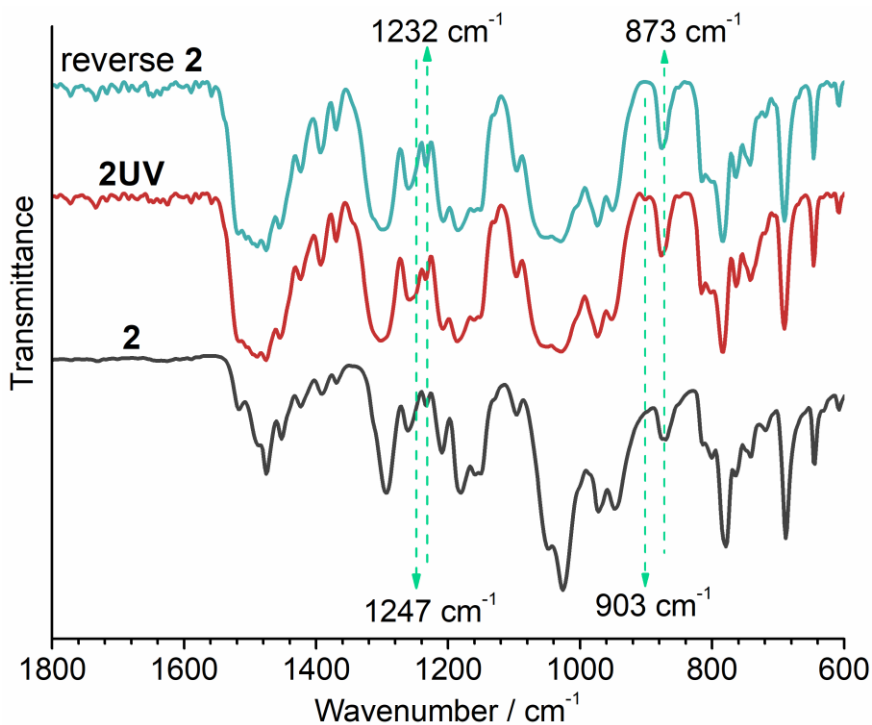

**Fig. S8** The FTIR spectra for the samples of **2**, **2UV** given by exposing **2** to 280 nm UV light, and reversed sample **2** by exposing **2UV** to 365 nm UV light.



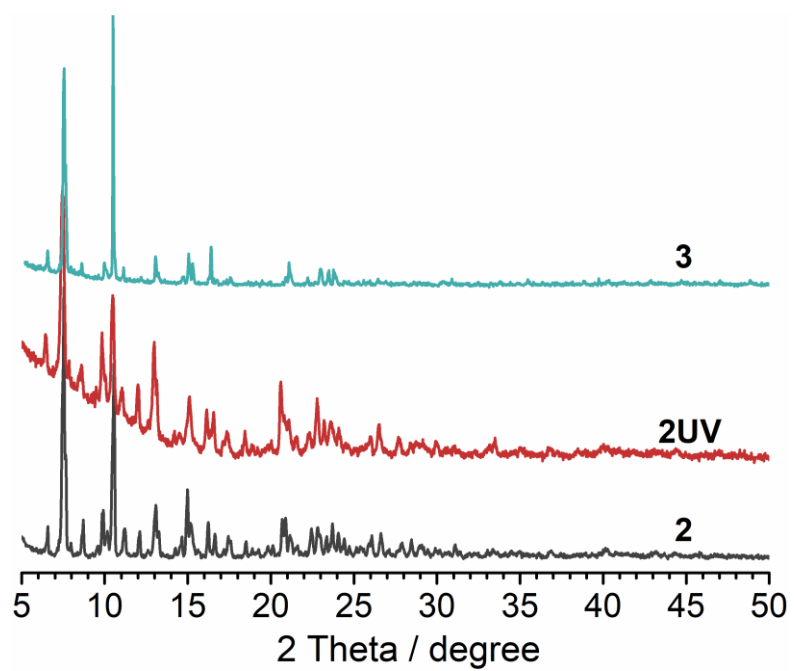

**Fig. S9** The PXRD pattern for the sample of **2UV** given by exposing sample **2** to 280 nm UV light, identical to that of **2** and far from that of **3**.

### III. Calculation

**Table S6** The cell parameters, selective distances and relative energies of optimized structures.

| structures                              | <b>2</b>                     | <b>2-opt</b>                 | <b>A</b>                     | <b>B</b>                     | <b>C</b>                     | <b>D</b>                     | <b>3</b>                     |
|-----------------------------------------|------------------------------|------------------------------|------------------------------|------------------------------|------------------------------|------------------------------|------------------------------|
| Space group                             | $P\bar{1}$                   |
| $a$ (Å)                                 | 12.017                       | 12.025                       | 11.967                       | 12.146                       | 12.048                       | 12.027                       | 12.132                       |
| $b$ (Å)                                 | 13.485                       | 13.501                       | 13.234                       | 13.456                       | 13.137                       | 13.505                       | 13.334                       |
| $c$ (Å)                                 | 23.445                       | 23.455                       | 23.544                       | 23.443                       | 23.266                       | 23.435                       | 23.308                       |
| $\alpha$ (°)                            | 90.47                        | 90.60                        | 90.89                        | 90.67                        | 90.45                        | 90.25                        | 90.47                        |
| $\beta$ (°)                             | 97.26                        | 97.18                        | 97.39                        | 96.95                        | 95.91                        | 96.79                        | 96.00                        |
| $\gamma$ (°)                            | 93.18                        | 92.85                        | 94.23                        | 95.13                        | 92.90                        | 94.05                        | 92.72                        |
| $V$ (Å <sup>3</sup> )                   | 3762.5                       | 3772.9                       | 3686.6                       | 3787.0                       | 3658.0                       | 3770.2                       | 3745.4                       |
| $\Delta V$ (%)                          | 0.0                          | +0.3                         | -2.0                         | +0.6                         | -2.8                         | +0.2                         | -0.5                         |
| Dy-O(-P) (Å)                            | 2.288-<br>2.327              | 2.276-<br>2.321              | 2.228-<br>2.295              | 2.257-<br>2.313              | 2.249-<br>2.284              | 2.245-<br>2.286              | 2.290-<br>2.304              |
| Dy-O(-N) (Å)                            | 2.423-<br>2.481              | 2.406-<br>2.485              | 2.406-<br>2.552              | 2.425-<br>2.496              | 2.436-<br>2.504              | 2.405-<br>2.513              | 2.418-<br>2.487              |
| C2-C9A (Å)                              | 1.634                        | 1.634                        | 3.388                        | 1.636                        | 1.636                        | 1.642                        | 1.632                        |
| C21-C28B (Å)                            | 1.627                        | 1.631                        | 1.637                        | 3.217                        | 1.633                        | 1.638                        | 1.631                        |
| C40-C47C (Å)                            | 1.622                        | 1.637                        | 1.652                        | 1.649                        | 3.552                        | 1.668                        | 3.599                        |
| C59-C66D (Å)                            | 1.657                        | 1.628                        | 1.635                        | 1.640                        | 1.636                        | 3.399                        | 1.633                        |
| Intralayer Dy-Dy<br>(Å) [(A), (B), (C)] | 14.714,<br>15.212,<br>14.115 | 14.737,<br>15.255,<br>14.084 | 14.458,<br>15.307,<br>14.115 | 14.629,<br>15.173,<br>14.127 | 14.512,<br>15.201,<br>13.785 | 14.586,<br>15.151,<br>14.206 | 14.631,<br>15.248,<br>13.831 |
| $\Delta E$ (kJ mol <sup>-1</sup> )      |                              | 0.0                          | -8.4                         | +34.8                        | -37.3                        | -1.9                         | -                            |

**Table S7** The parameters, distances and relative energies of optimized structures during dissociation of the depma<sub>2</sub>-C.

| <i>d</i> (C40-C47) (Å)                  | <b>1.637</b>                 | <b>2.110</b>                 | <b>2.266</b>                 | <b>2.429</b>                 | <b>2.603</b>                 | <b>3.552</b>                 |
|-----------------------------------------|------------------------------|------------------------------|------------------------------|------------------------------|------------------------------|------------------------------|
| <i>a</i> (Å)                            | 12.025                       | 12.005                       | 11.976                       | 11.938                       | 11.961                       | 12.048                       |
| <i>b</i> (Å)                            | 13.501                       | 13.412                       | 13.321                       | 13.247                       | 13.413                       | 13.137                       |
| <i>c</i> (Å)                            | 23.455                       | 23.398                       | 23.363                       | 23.330                       | 23.430                       | 23.266                       |
| $\alpha$ (°)                            | 90.60                        | 90.65                        | 91.01                        | 91.40                        | 90.95                        | 90.45                        |
| $\beta$ (°)                             | 97.18                        | 97.27                        | 97.41                        | 97.59                        | 97.47                        | 95.91                        |
| $\gamma$ (°)                            | 92.85                        | 92.98                        | 92.51                        | 91.92                        | 92.58                        | 92.90                        |
| <i>V</i> (Å <sup>3</sup> )              | 3772.9                       | 3731.2                       | 3691.39                      | 3653.60                      | 3722.39                      | 3658.0                       |
| $\Delta V$ (%)                          | 0.0                          | -1.1                         | -2.2                         | -3.2                         | -1.3                         | -3.0                         |
| Intralayer Dy-Dy<br>(Å) [(A), (B), (C)] | 14.737,<br>15.255,<br>14.084 | 14.658,<br>15.233,<br>14.060 | 14.642,<br>15.300,<br>13.950 | 14.629,<br>15.376,<br>13.841 | 14.625,<br>15.293,<br>14.061 | 14.512,<br>15.201,<br>13.785 |
| $\Delta E$ (kJ mol <sup>-1</sup> )      | 0.0                          | 41.6                         | 50.6                         | 48.2                         | 23.0                         | -37.3                        |

**Table S8** The parameters, distances and relative energies of optimized structures during dissociation of the depma<sub>2</sub>-A.

| <i>d</i> (C2-C9) (Å)                    | <b>1.634</b>                 | <b>2.104</b>                 | <b>2.155</b>                 | <b>2.317</b>                 | <b>2.593</b>                 | <b>3.388</b>                 |
|-----------------------------------------|------------------------------|------------------------------|------------------------------|------------------------------|------------------------------|------------------------------|
| <i>a</i> (Å)                            | 12.025                       | 12.124                       | 11.951                       | 11.969                       | 11.983                       | 11.878                       |
| <i>b</i> (Å)                            | 13.501                       | 13.636                       | 13.038                       | 13.322                       | 13.332                       | 13.240                       |
| <i>c</i> (Å)                            | 23.455                       | 23.475                       | 23.287                       | 23.327                       | 23.467                       | 23.433                       |
| $\alpha$ (°)                            | 90.60                        | 90.46                        | 90.38                        | 90.03                        | 90.26                        | 90.88                        |
| $\beta$ (°)                             | 97.18                        | 97.12                        | 97.82                        | 97.34                        | 96.57                        | 97.49                        |
| $\gamma$ (°)                            | 92.85                        | 92.60                        | 92.34                        | 92.51                        | 92.63                        | 92.76                        |
| <i>V</i> (Å <sup>3</sup> )              | 3772.9                       | 3667.1                       | 3591.5                       | 3685.6                       | 3720.6                       | 3648.6                       |
| $\Delta V$ (%)                          | 0.0                          | -2.8                         | -4.8                         | -2.3                         | -1.4                         | -3.3                         |
| Intralayer Dy-Dy<br>(Å) [(A), (B), (C)] | 14.737,<br>15.255,<br>14.084 | 14.809,<br>15.266,<br>14.154 | 14.633,<br>15.312,<br>13.857 | 14.825,<br>15.264,<br>13.919 | 14.921,<br>15.271,<br>13.898 | 14.718,<br>15.359,<br>13.894 |
| $\Delta E$ (kJ mol <sup>-1</sup> )      | 0.0                          | 44.0                         | 66.4                         | 67.6                         | 36.6                         | -12.2                        |

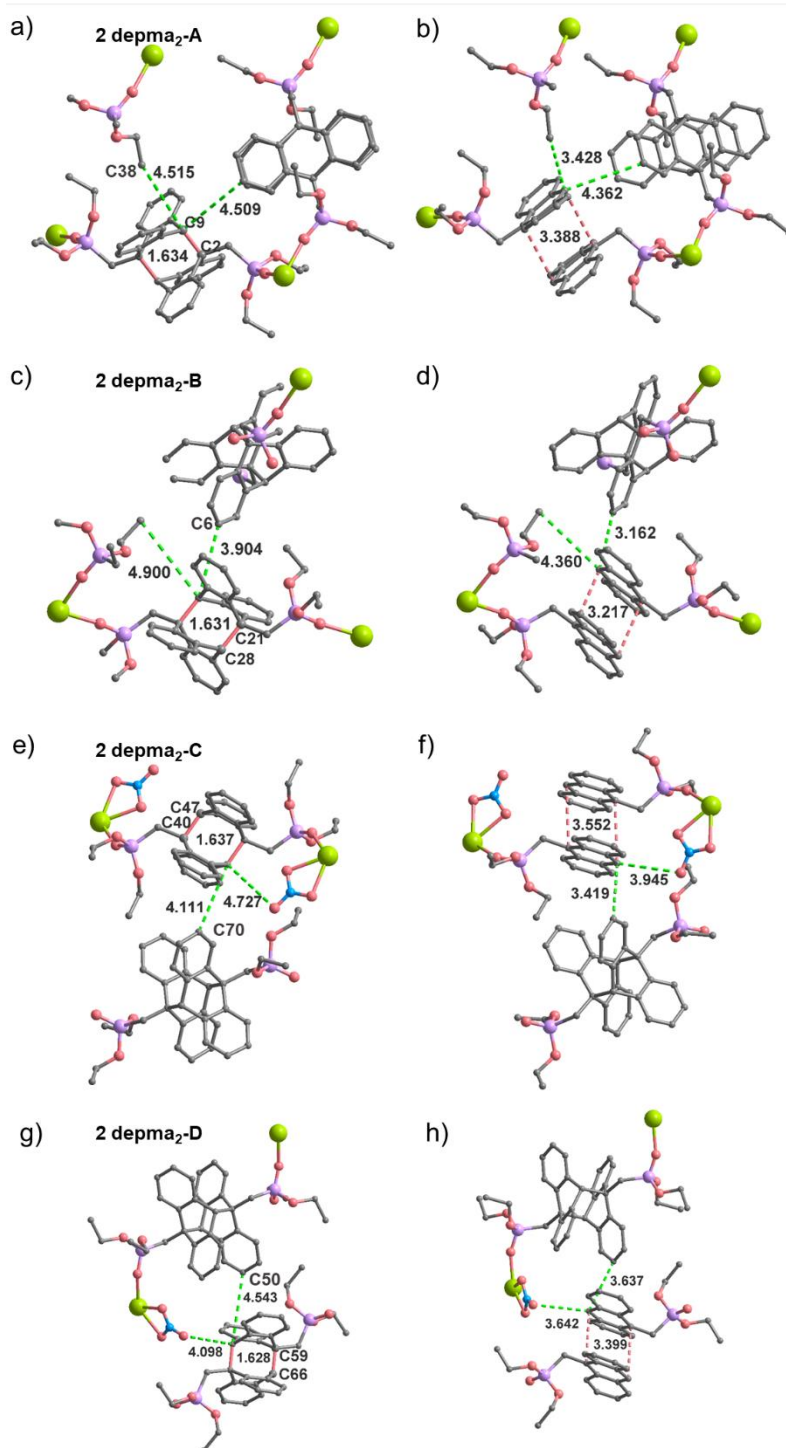

**Fig. S10** The optimized structure for **2** (a, c, e, g) and the dissociation of depma<sub>2</sub>-A (b), -B (d), -C (f) and -D (h) to compare the changes of their local environments. The dianthracene plane of depma<sub>2</sub>-C faces the intralayer guest of depma<sub>2</sub>-D in a flexible pore, allowing a long separation by  $d(\text{C40-C47}') = 3.552 \text{ \AA}$ . However, the extension of dissociated depma<sub>2</sub>-A, B, and D are limited in confined lattice wherein anthracene planes face with adjacent 2D layers.

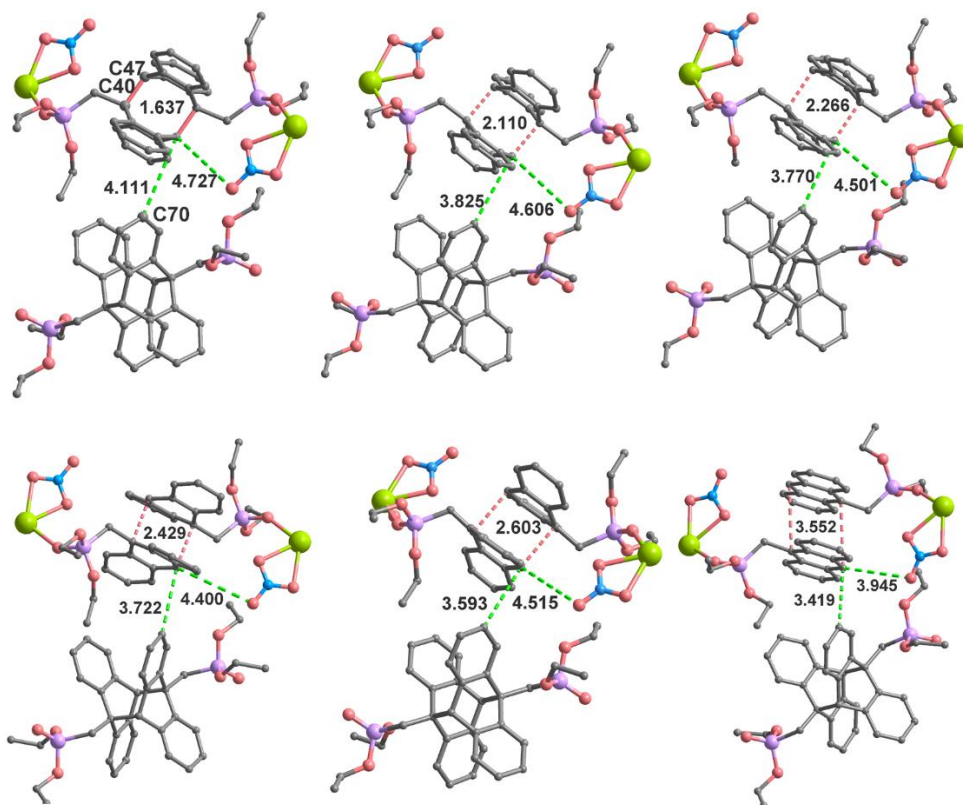

**Fig. S11** The simulated dissociation of  $\text{depma}_2\text{-C}$  with gradual elongation of C40-C47 distance showing the reduced distance of C47-C70 from 4.111 to 3.419 Å, hinting the increasing steric hindrance from the faced intralayer  $\text{depma}_2\text{-D}$ .

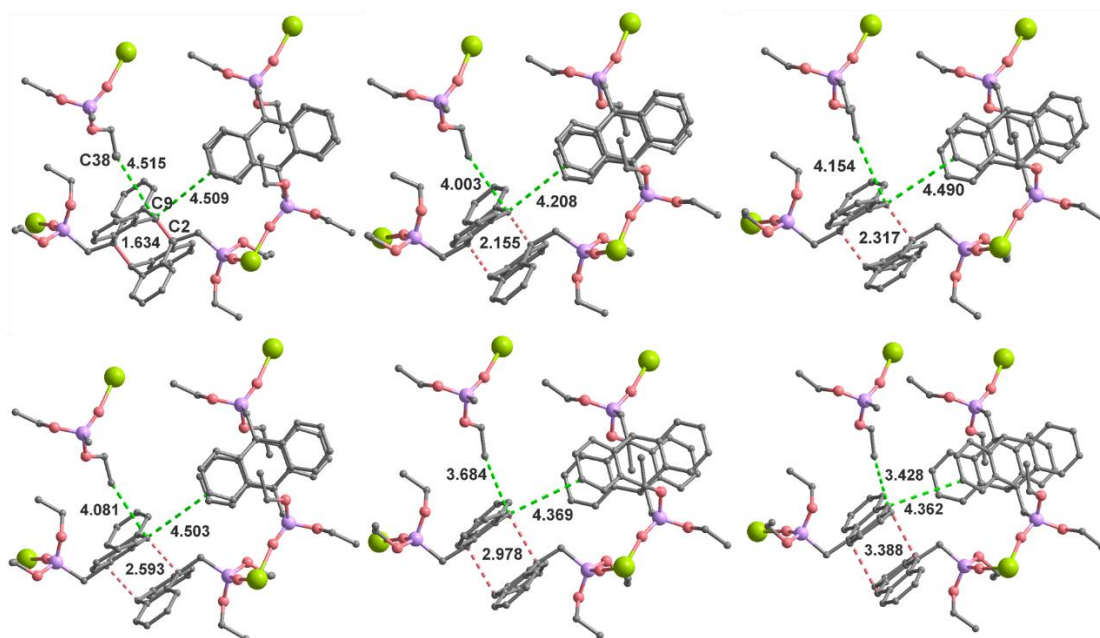

**Fig. S12** The simulated dissociation of  $\text{depma}_2\text{-A}$  with gradual elongation of C2-C9 distance showing the reduced distance of C9-C38 from 4.515 to 3.428 Å, hinting the increasing steric hindrance from the ethyl of the neighboring 2D layer.

#### IV. Photoluminescent switching

**Table S9** The emission lifetimes at room temperature for compound **1**, **2**, **3** and **2UV** excited at 375 nm for short nanosecond lifetime and at 370 nm for long microsecond lifetime, and absolute photoluminescent quantum yield (PLQY) excited at 365 nm.

| compound   | $\lambda_{em}$ / nm | $\tau_1$ / ns | $\tau_2$ / ns | $\tau_{average}$ | $\chi^2$ | PLQY    |
|------------|---------------------|---------------|---------------|------------------|----------|---------|
| <b>1</b>   | 420                 | 3.83 (63.2 %) | 15.2 (36.8 %) | 5.29 ns          | 1.11     | 12.1(9) |
|            | 475                 | 64.6 us       | —             | 64.6 us          | 1.08     |         |
|            | 574                 | 72.7 us       | —             | 72.7 us          | 1.16     |         |
| <b>2</b>   | 420                 | 4.10 (66.7%)  | 15.3 (33.3%)  | 5.43             | 1.15     | 6.7(1)  |
| <b>3</b>   | 535                 | 42.3          | —             | 42.3             | 1.12     | 4.9(1)  |
| <b>2UV</b> | 446                 | 0.228(25.87%) | 4.30(74.13%)  | 0.765            | 1.28     | 1.6(1)  |
|            | 526                 | 1.52 (13.12%) | 18.5(86.88%)  | 7.50             | 1.10     |         |

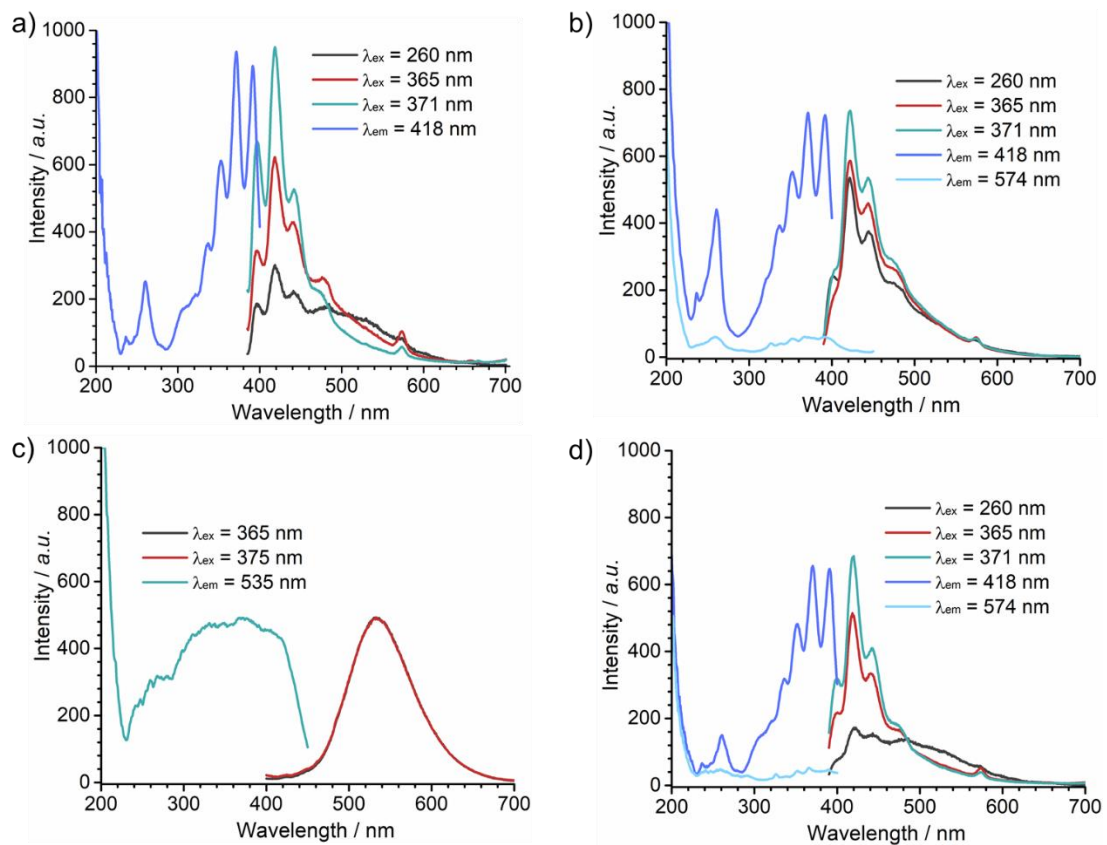

**Fig. S13** The excitation and emission spectra for samples 1 (a), 2 (b), 3 (c) and reversed 2 by exposing 3 to 365 nm UV light (d) monitored at depicted wavelength.

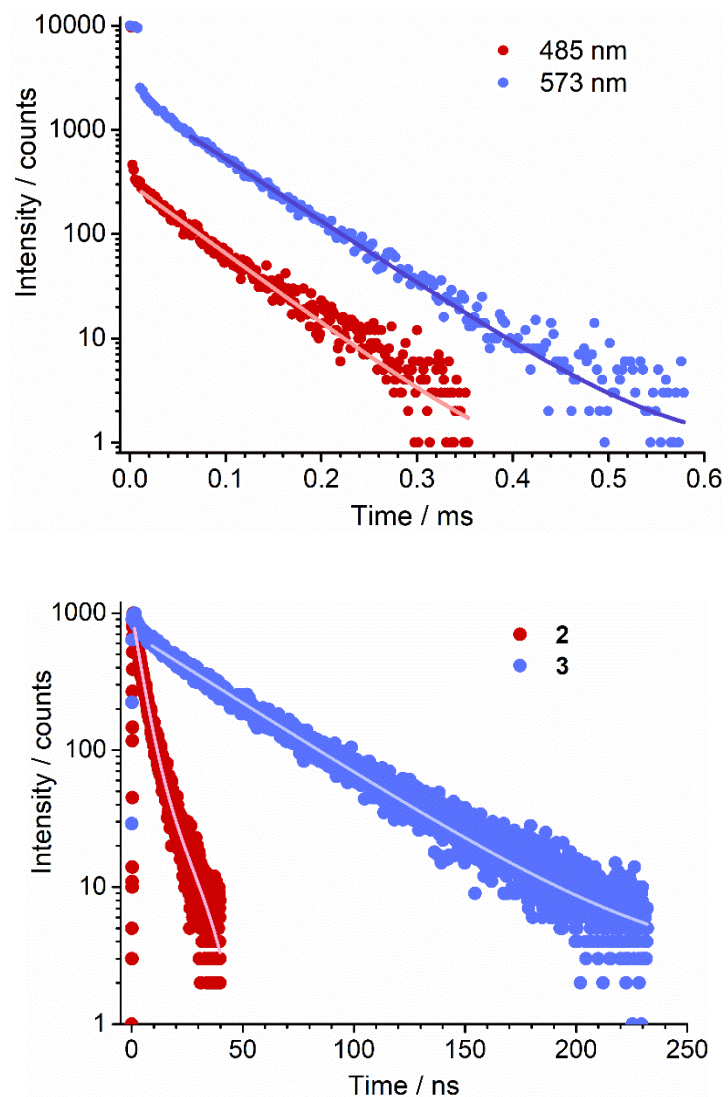

**Fig. S14** (Top) The photoluminescent decay curves for **1** monitored at 485 and 573 nm. (Bottom) The photoluminescent decay curves for **2** and **3** monitored at 420 and 535 nm respectively which is fitted to single exponential decay equation.



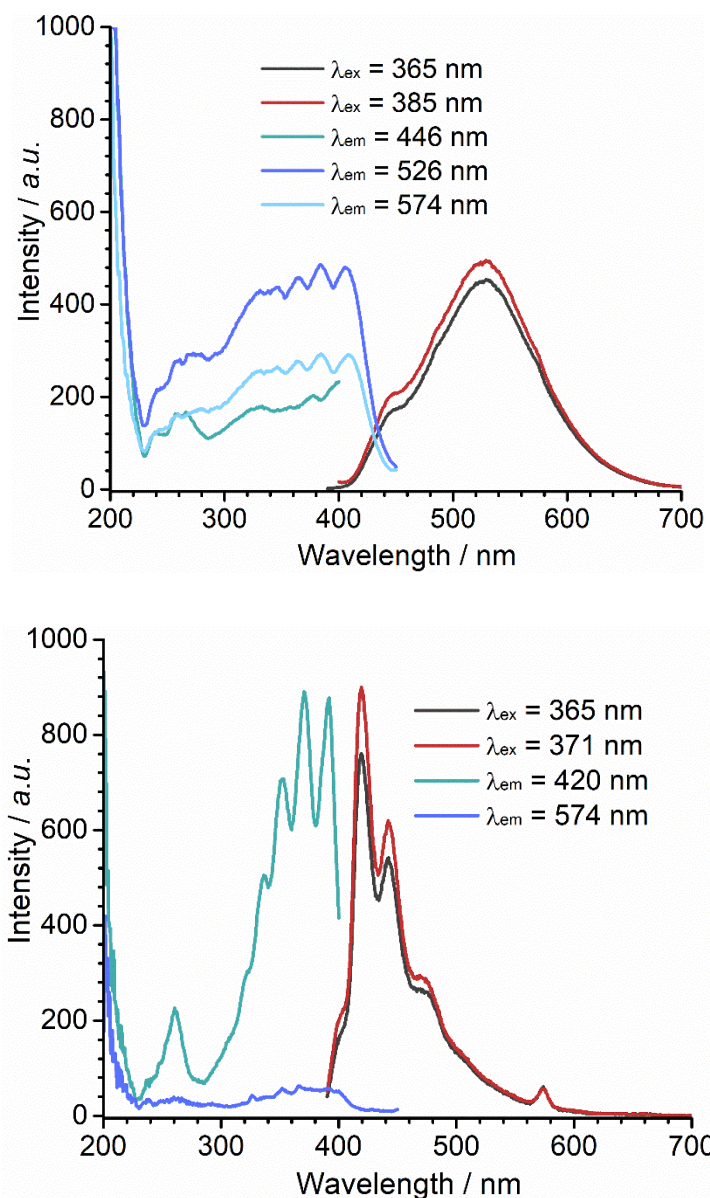

**Fig. S15** The excitation and emission spectra for samples **2UV** (top) and reversed **2** by exposing **2UV** to 365 nm UV light (bottom) monitored at depicted wavelength.

## V. Photogenerated heterostructured crystal as photonic barcode

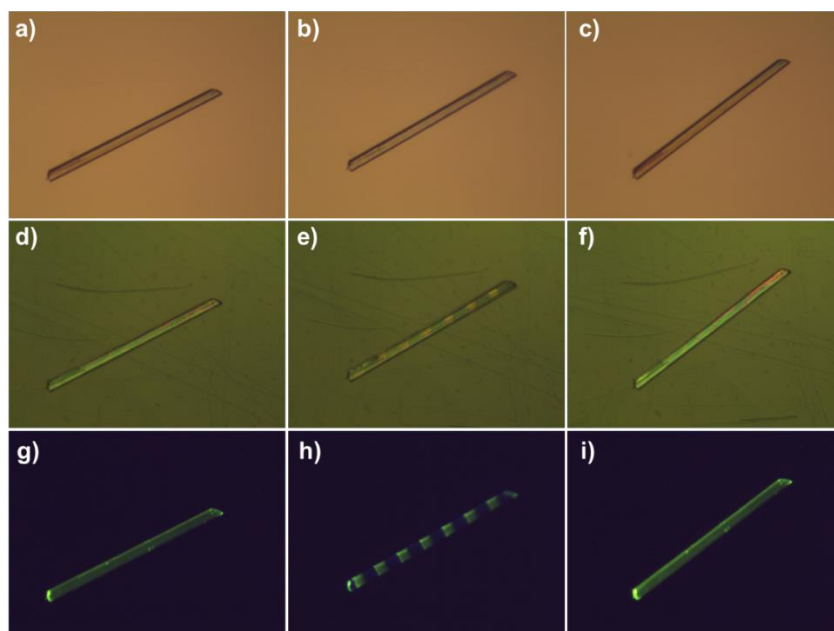

**Fig. S16** The photographs for single crystal of pure **3** (a, d, g), heterostructure with sequenced **2** and **3** made by photolithography (b, e, h), reversed **3** by thermal erasure at 140 °C (c, f, i), taken from the transmission (above) and reflectance (middle) lamp light and UV light (bottom).

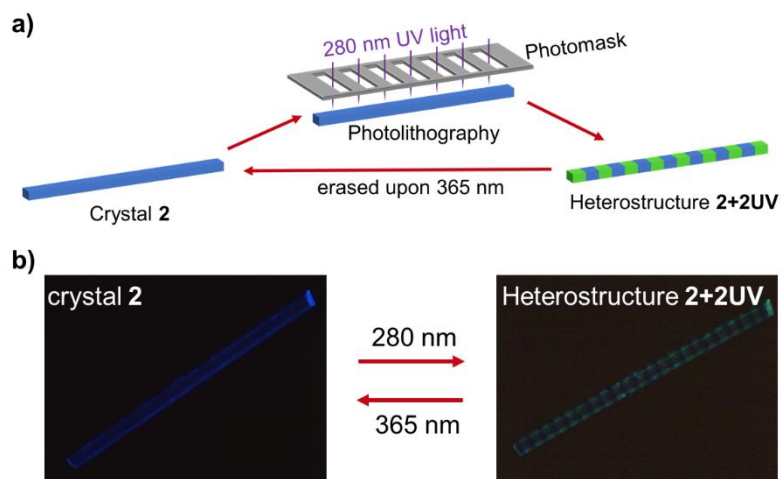

**Fig. S17** a) The scheme to show the photolithography process to fabricate and erase the heterostructured crystal **2+2UV**. b) The fluorescent graphs showing the switching between the crystal **2** and heterostructured crystal consisting of sequent **2** and **2UV** blocks.

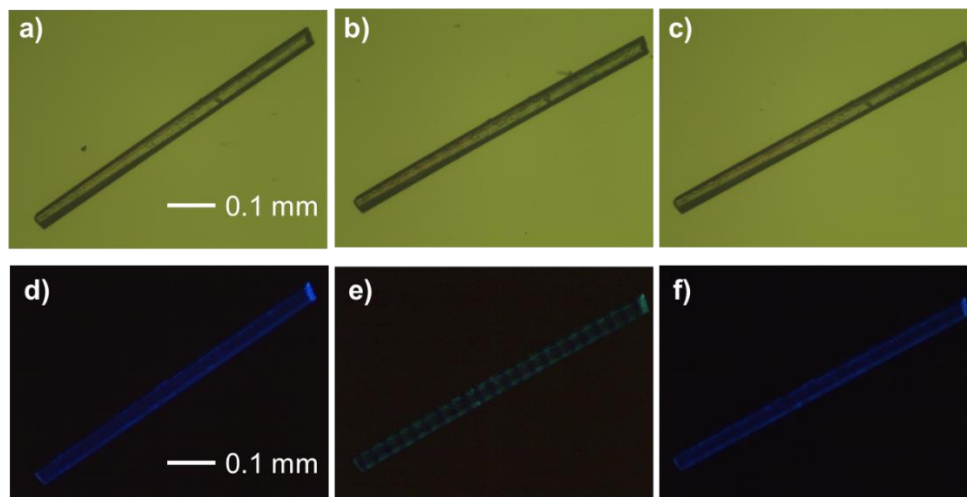

**Fig. S18** The photographs for single crystal of pure **2** (a, d), heterostructure with sequenced **2** and **2UV** made by photolithography under 254 nm UV light (b, e), reversed **2** by irradiation with 365 nm UV light for 2 min (c, f), taken from lamp light (top) and UV light (bottom).

## VI. Photomechanical effect

**Table S10** Some recently reported crystals of coordination compounds showing photomechanical effects.

| Compounds (dimension)                                                                                                             | Crystal shape | Mechanical effect                     | reversibility | mechanism                                                                       | Working temperature                   | Ref.      |
|-----------------------------------------------------------------------------------------------------------------------------------|---------------|---------------------------------------|---------------|---------------------------------------------------------------------------------|---------------------------------------|-----------|
| $[(\text{Rh})_2(\eta^5\text{-C}_5\text{Me}_4\eta\text{-C}_5\text{H}_{11})_2(\mu\text{-CH}_2)_2(\mu\text{-O}_2\text{SSO}_2)]$ (0D) | rod           | bending                               | yes           | $\mu\text{-O}_2\text{SSO}_2$ and $\mu\text{-O}_2\text{SOSO}$ photoisomerization | bending at RT, reversed at 105–110 °C | 5         |
| $[\text{Co}(\text{NH}_3)_5\text{NO}_2]\text{Cl}(\text{NO}_3)$ (0D)                                                                | needle-shaped | bending                               | yes           | nitro–nitrito isomerisation                                                     | 80–363 K                              | 6-8       |
|                                                                                                                                   | prismatic     | exploding, hopping, traveling         | no            |                                                                                 | RT                                    | 9         |
| $(1,10\text{-phen})\text{Co}(3,6\text{-DBSQ})_2$ (0D)                                                                             | Thin plate    | bending                               | yes           | valence tautomerism                                                             | 242–265 K                             | 10        |
| $[\text{Ru}(\text{NH}_3)_4(\text{SO}_2)(3\text{-phenylpyridine})]\text{Cl}_2\cdot\text{H}_2\text{O}$ (0D)                         | block         | peeling                               | yes           | $\eta^1\text{-SO}_2$ to $\eta^1\text{-OSO}$ photoisomerization                  | 100 K                                 | 11        |
| $[\text{Zn}_2(\text{benzoate})_4(\text{L}^1)_2]$ (0D)                                                                             | block         | popping                               | no            | [2+2] cycloaddition                                                             | RT                                    | 12        |
| $[\text{Zn}(\text{bdc})(3\text{F-4spy})]$ (2D)                                                                                    | rod           | bending, twisting                     | no            | [2+2] cycloaddition                                                             | RT                                    | 13        |
| $\text{Ag}(\text{L}^1)_2\text{X}_2$ (0D)                                                                                          | block         | popping, hopping, leaping             | no            | [2+2] cycloaddition                                                             | RT                                    | 14        |
| $[\text{Zn}(\text{NCS})_2(2\text{F-4spy})_2]$ (0D)                                                                                | block         | popping                               | no            | [2+2] cycloaddition                                                             | RT                                    | 15        |
| $[\text{Zn}(\text{glu})(4\text{-nvp})]$ (1D)                                                                                      | block         | popping                               | no            | [2+2] cycloaddition                                                             | RT                                    | 16        |
| $[\text{PbI}_2(5\text{-SPym})(\text{DMF})]$ (1D)                                                                                  | rod           | jumping, splitting, rolling, breaking | no            | [2+2] cycloaddition                                                             | RT                                    | 17        |
| U-CB[8]-MPyVB (0D)                                                                                                                | rod           | bending                               | no            | [2+2] cycloaddition                                                             | RT                                    | 18        |
| $\text{Zn}(\text{acac})_2(6\text{cazpy})_2$ (0D)                                                                                  | plate         | bending                               | yes           | cis-trans isomerization                                                         | RT                                    | 19        |
| $[\text{Cu}(\text{CNAB})_4][\text{PF}_6]$ (0D)                                                                                    | rod           | bending                               | yes           | cis-trans isomerization                                                         | RT–333 K (60 °C)                      | 20        |
| $[\text{Dy}(\text{depma}_2)_{1.5}(\text{NO}_3)_3]\cdot 0.5\text{depma}_2$ (2D)                                                    | rod           | bending, contraction                  | yes           | [4+4] cycloaddition                                                             | RT–423 K (150 °C)                     | This work |

1,10-phen = 1,10-phenanthroline, 3,6-DBSQ = anion-radical of 3,6-di-tert-butyl-o-benzoquinone, H<sub>2</sub>bdc = 1,4-benzenedicarboxylic acid, L<sup>1</sup> = 4-styrylpyridine (4spy), X = NO<sub>3</sub><sup>-</sup>; L<sup>1</sup> = 2'-fluoro-4-styrylpyridine (2F-4spy), X = BF<sub>4</sub><sup>-</sup>, ClO<sub>4</sub><sup>-</sup>; L<sup>1</sup> = 3'-fluoro-4-styrylpyridine (3F-4spy), X = BF<sub>4</sub><sup>-</sup>, ClO<sub>4</sub><sup>-</sup> and NO<sub>3</sub><sup>-</sup>, H<sub>2</sub>glu = glutaric acid, 4-nvp = 4-(1-naphthylvinyl)pyridine, 5-Spym = trans-5-Styrylpyrimidine, acac<sup>-</sup> = acetylacetonate, 6cazpy = 4-(4-(6-Hydroxyhexyloxy) phenylazo), CNAB = 4-isocyanoazobenzene. RT = room temperature

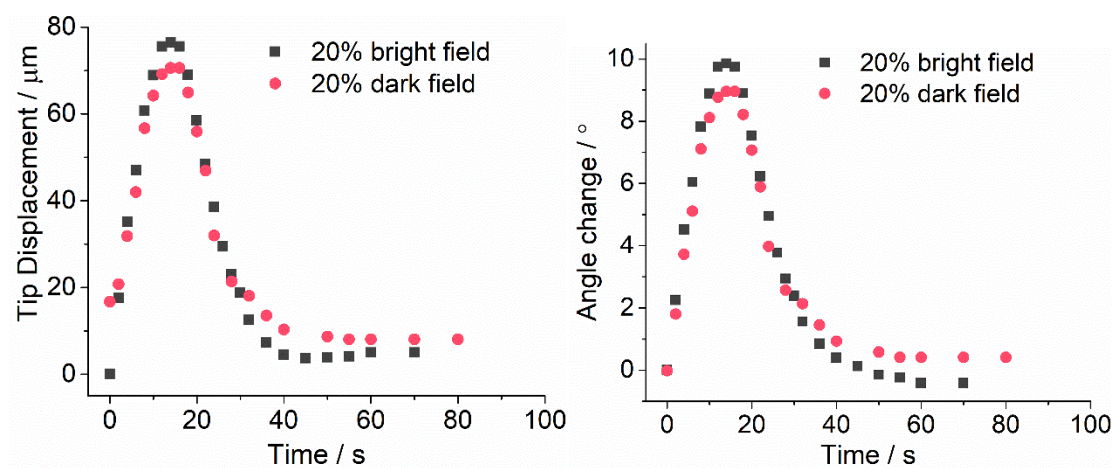

**Fig. S19** The tip displacement (left) and deviation angle (right) during the photobending processes upon irradiation with 365 nm UV light (20% power) for selected rod-like crystal **C**.

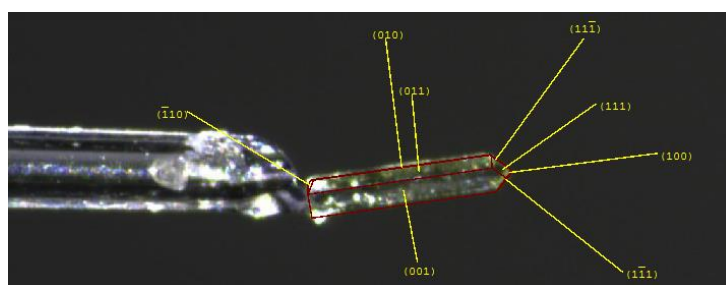

**Fig. S20** The crystal face index for one rod-like crystal of **3**.

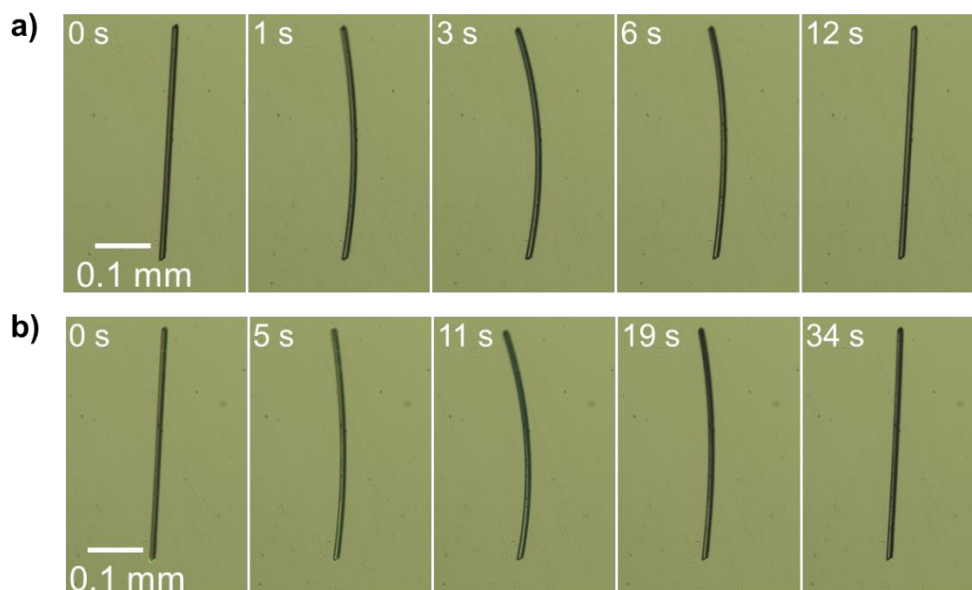

**Fig. S21** The photobending for crystal **D** of compound **3** upon irradiation with 365 nm UV light (20% power) at 140°C (a) and room temperature (b).

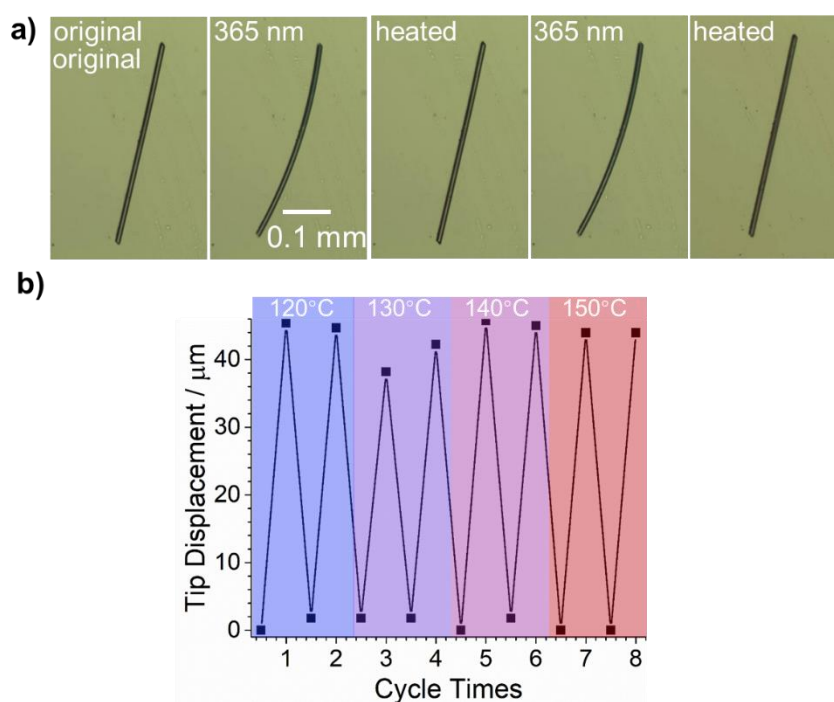

**Fig. S22** a) The pictures for the repeated photobending deformation for crystal **D** through alternate irradiation with 365 nm UV light (20 % power) for the first 3s and thermal annealing at 140°C for 3 min. b) The tip displacements for the reversible bending of crystal **D** of **3** up to 8th times driven by alternative irradiation with 365 nm UV light in 20% power for 3 s and thermal annealing at 120°C for 12 min, 130°C for 5 min, 140°C for 3 min, 150°C for 2 min.

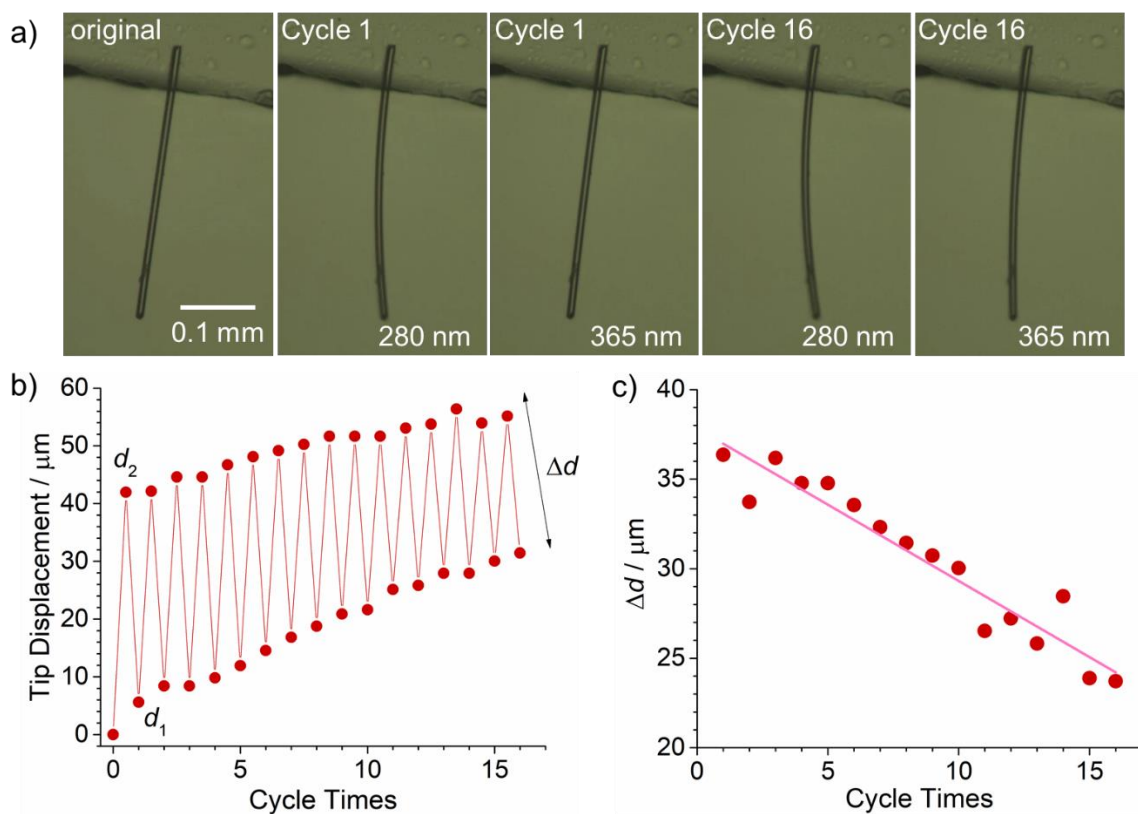

**Fig. S23** The pictures (a) and tip displacements (b, c) for the repeated photobending for crystal **F** of compound **2** through irradiation with alternate 280 nm in 20 % power for 8 s and 365 nm UV light in 20% power for 10 s.

## VII. References:

1. J.-C. Liu, X.-D. Huang, Q. Zou, S.-S. Bao, X.-Z. Wang, J.-Y. Ma and L.-M. Zheng, *J. Mater. Chem. C*, 2020, **8**, 7369–7377.
2. SAINT. Program for Data Extraction and Reduction. Siemens Analytical X-ray Instruments. Madison, WI, 1994–1996.
3. L. Krause, R. Herbst-Irmer, G.M. Sheldrick and D. S. Icke, *J. Appl. Cryst.*, 2015, **48**, 3–10.
4. G. M. Sheldrick, *Acta Cryst.*, 2015, **C71**, 3–8.
5. H. Nakai, K. Matsuba, M. Akimoto, T. Nozaki, T. Matsumoto, K. Isobe, M. Irie and S. Ogo, *Chem. Commun.*, 2016, **52**, 4349–4352.
6. A. A. Sidelnikov, S. A. Chizhik, B. A. Zakharov, A. P. Chupakhin and E. V. Boldyreva, *CrystEngComm*, 2016, **18**, 7276–7283.
7. S. Chizhik, A. Sidelnikov, B. Zakharov, P. Naumov and E. Boldyreva, *Chem. Sci.*, 2018, **9**, 2319–2335.
8. S. Chizhika, A. Sidelnikov, B. Zakharov and E. Boldyreva, *Materials Today: Proceedings*, 2019, **12**, 35–38. 2019
9. P. Naumov, S. C. Sahoo, B. A. Zakharov and E. V. Boldyreva, *Angew. Chem. Int. Ed.*, 2013, **52**, 9990–9995.
10. M. P. Bubnov, K. A. Kozhanov, N. A. Skorodumova and V. K. Cherkasov, *Inorg. Chem.*, 2020, **59**, 6679–6683.
11. J. M. Cole, J. d. J. Velazquez-Garcia, D. J. Gosztola, S. G. Wang and Y.-S. Chen, *Chem. Mater.*, 2019, **31**, 4927–4935.
12. R. Medishetty, A. Husain, Z. Bai, T. Runčevski, R. E. Dinnebier, P. Naumov, J. J. Vittal, *Angew. Chem. Int. Ed.*, 2014, **53**, 5907–5911.
13. Y.-X. Shi, W.-H. Zhang, B. F. Abrahams, P. Braunstein and J.-P. Lang, *Angew. Chem. Int. Ed.*, 2019, **58**, 9453–9458.
14. R. Medishetty, S. C. Sahoo, C. E. Mulijanto, P. Naumov and J. J. Vittal, *Chem. Mater.*, 2015, **27**, 1821–1829.
15. C. E. Mulijanto, H. S. Quah, G. K. Tan, B. Donnadiu and J. J. Vittal, *IUCrJ*, 2017, **4**, 65–71.
16. B. Dutta, C. Sinha and M. H. Mir, *Chem. Commun.*, 2019, **55**, 11049–11051.
17. B. B. Rath and J. J. Vittal, *J. Am. Chem. Soc.*, 2020, **142**, 20117–20123.
18. J.-s. Geng, L. Mei, Y.-y. Liang, L.-y. Yuan, J.-p. Yu, K.-q. Hu, L.-h. Yuan, W. Feng, Z.-f. Cha and W.-q. Shi, *Nat. Commun.*, 2022, **13**, 2030.
19. Y. Guo, Y. Hao, L. Gao and H. Hao, *Crystals*, 2020, **10**, 92.
20. A. K. Bartholomew, I. B. Stone, M. L. Steigerwald, T. H. Lambert and X. Roy, *J. Am. Chem. Soc.*, 2022, **144**, 16773–16777.
